# Supplementary material
Source: MDPI journal article supplement (https://www.mdpi.com/2076-3417/12/3/1078)
Supplement: s1 [file s1]

## DATA SHEET

Date:

Type of vehicle:

☐ lorry only

☐ lorry and trailer

Arrival time:

Start of unloading time:

### Checkpoint T1: Unloading from lorry

|                     | Deck 1 (bottom) | Deck 2 (middle) | Deck 3 (upper) |
|---------------------|-----------------|-----------------|----------------|
| Number of pigs      |                 |                 |                |
|                     |                 |                 |                |
| Falling             | ×××××           | ×××××××××       |                |
| Slipping            | ×××             | ××              |                |
| Reluctance to move  | ×               |                 |                |
| Turning back        | ×××             | ×               |                |
| Jumping             |                 |                 |                |
| Elimination         | ×               |                 |                |
| Vocalization        | ×××             |                 |                |
| Panting             |                 | ×               |                |
| Shivering           |                 |                 |                |
| Overlapping         |                 |                 |                |
| Overcrowding        |                 |                 |                |
|                     |                 |                 |                |
| Pigs with wounds    | ××              |                 |                |
| Pigs with hematomas |                 |                 |                |
| Discoloration       | ×               |                 |                |
| Lameness            |                 |                 |                |
| Dead animals        |                 |                 |                |
|                     |                 |                 |                |

|                         |                                                          |                                                          |                                                          |
|-------------------------|----------------------------------------------------------|----------------------------------------------------------|----------------------------------------------------------|
| Hit with stick          |                                                          |                                                          |                                                          |
| Hit with plastic tube   |                                                          |                                                          |                                                          |
| Hit with rubber stick   |                                                          |                                                          |                                                          |
| Poke with electric goad | ××××                                                     |                                                          |                                                          |
| Shouts                  |                                                          |                                                          |                                                          |
| Sawdust on deck floor   | <input type="checkbox"/> Yes <input type="checkbox"/> No | <input type="checkbox"/> Yes <input type="checkbox"/> No | <input type="checkbox"/> Yes <input type="checkbox"/> No |
| Lairage pen number      |                                                          |                                                          |                                                          |

### Checkpoint T1: Unloading from trailer

|                       | Deck 4 (bottom) | Deck 5 (middle) | Deck 6 (upper) |
|-----------------------|-----------------|-----------------|----------------|
| Number of pigs        |                 |                 |                |
|                       |                 |                 |                |
| Falling               |                 |                 |                |
| Slipping              |                 |                 |                |
| Reluctance to move    |                 |                 |                |
| Turning back          |                 |                 |                |
| Jumping               |                 |                 |                |
| Elimination           |                 |                 |                |
| Vocalization          |                 |                 |                |
| Panting               |                 |                 |                |
| Shivering             |                 |                 |                |
| Overlapping           |                 |                 |                |
| Overcrowding          |                 |                 |                |
|                       |                 |                 |                |
| Pigs with wounds      |                 |                 |                |
| Pigs with hematomas   |                 |                 |                |
| Discoloration         |                 |                 |                |
| Lameness              |                 |                 |                |
| Dead animals          |                 |                 |                |
|                       |                 |                 |                |
| Hit with stick        |                 |                 |                |
| Hit with plastic tube |                 |                 |                |
| Hit with rubber stick |                 |                 |                |

|                         |                                                          |                                                          |                                                          |
|-------------------------|----------------------------------------------------------|----------------------------------------------------------|----------------------------------------------------------|
| Poke with electric goad |                                                          |                                                          |                                                          |
| Shouts                  |                                                          |                                                          |                                                          |
| Sawdust on deck floor   | <input type="checkbox"/> Yes <input type="checkbox"/> No | <input type="checkbox"/> Yes <input type="checkbox"/> No | <input type="checkbox"/> Yes <input type="checkbox"/> No |
| Lairage pen number      |                                                          |                                                          |                                                          |

Date:

Time:

**Checkpoint T2: from lairage pen to stunning area**

|                    | Pen N°... |
|--------------------|-----------|-----------|-----------|-----------|-----------|-----------|
| Number of pigs     |           |           |           |           |           |           |
|                    |           |           |           |           |           |           |
| Falling            |           |           |           |           |           |           |
| Slipping           |           |           |           |           |           |           |
| Reluctance to move |           |           |           |           |           |           |
| Turning back       |           |           |           |           |           |           |
| Jumping            |           |           |           |           |           |           |
| Elimination        |           |           |           |           |           |           |
| Vocalization       |           |           |           |           |           |           |
| Panting            |           |           |           |           |           |           |
| Pushes             |           |           |           |           |           |           |
| Overcrowding       |           |           |           |           |           |           |
|                    |           |           |           |           |           |           |
| Side discoloration |           |           |           |           |           |           |
| Ear discoloration  |           |           |           |           |           |           |

|                          |  |  |  |  |  |  |
|--------------------------|--|--|--|--|--|--|
| Thigh<br>discoloration   |  |  |  |  |  |  |
| Back<br>discoloration    |  |  |  |  |  |  |
|                          |  |  |  |  |  |  |
| Hit with plastic<br>tube |  |  |  |  |  |  |
| Shouts                   |  |  |  |  |  |  |

### Lesion score (DMRI)

Date:

Time:

- 1 None or a little superficial skin damage
- 2 Slight skin damage, with superficial lesions of up to 3 cm length.
- 3 Skin damage affecting quality. A clear deep and/or long lesion (> 3 cm) accompanied with superficial damage and circular areas of bruises.
- 4 Extreme damage. Long and deep lesions.

[illegible]

[illegible]

[illegible]

[illegible]
