# Supplementary material
Source: MDPI journal article supplement (https://www.mdpi.com/2076-3417/12/3/1078)
Supplement: s1 [file s1]

**Table S1.** Description of the four-point scale used to classify the 1680 pig carcasses.

| Shoulder                                                                           | Middle                                                                             | Rear                                                                               | Scale | Description                                                                                                                                |
|------------------------------------------------------------------------------------|------------------------------------------------------------------------------------|------------------------------------------------------------------------------------|-------|--------------------------------------------------------------------------------------------------------------------------------------------|
|   |   |   | 1     | None or a little superficial skin damage                                                                                                   |
|   |   |   | 2     | Slight skin damage, with superficial lesions of up to 3 cm length.                                                                         |
|   |   |   | 3     | Skin damage affecting quality. A clear deep and/or long lesion (> 3 cm) accompanied with superficial damage and circular areas of bruises. |
|  |  |  | 4     | Extreme damage. Long and deep lesions.                                                                                                     |

**Table S2.** Associations between the dependent variable of the prevalence of carcasses with rear severe lesions and the independent variables of pen conditions and pre-slaughter events at unloading (T1) and before stunning (T2). Estimate values are reported for the variables showing *p*-values < 0.10. Data were obtained from 72 batches, each one made of 23/24 heavy pigs, for a total of 1680 crossbred heavy pigs (Duroc × (Landrace × Large White)) slaughtered between January and June 2014 in a commercial abattoir in Northern Italy.

| Independent variable                      | Estimate | <i>p</i> -value |
|-------------------------------------------|----------|-----------------|
| Vehicle                                   |          | 0.701           |
| Deck                                      |          | 0.879           |
| Pen width                                 |          | 0.301           |
| Pen length                                |          | 0.503           |
| Pen distance from stunning                |          | 0.675           |
| Pen area                                  |          | 0.255           |
| Pen stocking density (kg/m <sup>2</sup> ) |          | 0.330           |
| Pen space allowance                       |          | 0.245           |
| Falling at T1                             | 0.087    | 0.074           |
| Slipping at T1                            |          | 0.618           |
| Turning back at T1                        |          | 0.473           |
| Reluctance to move at T1                  |          | 0.159           |
| Overlapping at T1                         | -0.142   | 0.049           |
| Jumping at T1                             |          | 0.223           |
| Huddling at T1                            |          | 0.119           |
| Vocalization at T1                        | -0.048   | 0.019           |
| Panting at T1                             |          | 0.196           |
| Discoloration at T1                       |          | 0.832           |
| Shivering at T1                           |          | 0.823           |
| Lameness at T1                            | 0.314    | 0.044           |
| Total number of animal events at T1       |          | 0.746           |
| Hit with stick at T1                      |          | 0.382           |
| Hit with plastic tube at T1               |          | 0.335           |
| Poke with electric goad at T1             |          | 0.446           |
| Shouts at T1                              |          | 0.334           |
| Hit with rubber stick at T1               |          | 0.468           |
| Sawing on the transport deck              |          | 0.716           |
| Waiting before unloading                  | 0.058    | 0.0004          |
| Total number of human-animal events at T1 | 0.066    | 0.009           |
| Reluctance to move at T2                  |          | 0.898           |
| Pushes at T2                              |          | 0.317           |
| Falling at T2                             | 0.356    | 0.021           |
| Huddling at T2                            |          | 0.382           |
| Slipping at T2                            |          | 0.348           |
| Jumping at T2                             |          | 0.900           |
| Turning back at T2                        |          | 0.146           |
| Elimination at T2                         |          | 0.543           |
| Panting at T2                             |          | 0.776           |
| Side discoloration at T2                  |          | 0.170           |
| Ear discoloration at T2                   | 0.071    | 0.001           |
| Thigh discoloration at T2                 | 0.024    | 0.066           |
| Back discoloration at T2                  | 0.028    | 0.009           |
| Total number of animal events at T2       | 0.092    | 0.066           |
| Vocalization at T2                        |          | 0.806           |
| Hit with plastic tube at T2               | 0.109    | 0.023           |
| Shouts at T2                              | 0.116    | 0.014           |

**Table S3.** Associations between the dependent variable of the prevalence of carcasses with middle severe lesions and the independent variables of pen conditions and pre-slaughter events at unloading (T1) and before stunning (T2). Estimate values are reported for the variables showing *p*-values < 0.10. Data were obtained from 72 batches, each one made of 23/24 heavy pigs, for a total of 1680 crossbred heavy pigs (Duroc × (Landrace × Large White)) slaughtered between January and June 2014 in a commercial abattoir in Northern Italy.

| Independent variable                      | Estimate | <i>p</i> -value |
|-------------------------------------------|----------|-----------------|
| Vehicle:                                  |          | 0.240           |
| Deck                                      |          | 0.924           |
| Pen width                                 |          | 0.971           |
| Pen lenght                                | -0.0058  | 0.041           |
| Pen distance from stunning                |          | 0.585           |
| Pen area                                  |          | 0.737           |
| Pen stocking density (kg/m <sup>2</sup> ) |          | 0.861           |
| Pen space allowance                       |          | 0.718           |
| Falling at T1                             | 0.102    | 0.010           |
| Slipping at T1                            | 0.052    | 0.086           |
| Turning back at T1                        |          | 0.273           |
| Reluctance to move at T1                  |          | 0.493           |
| Overlapping at T1                         | -0.125   | 0.025           |
| Jumping at T1                             |          | 0.536           |
| Huddling at T1                            |          | 0.357           |
| Vocalization at T1                        |          | 0.120           |
| Panting at T1                             |          | 0.348           |
| Discoloration at T1                       | -0.109   | 0.025           |
| Shivering at T1                           |          | 0.859           |
| Lameness at T1                            |          | 0.825           |
| Total number of animal events at T1       |          | 0.100           |
| Hit with stick at T1                      | 0.152    | 0.0002          |
| Hit with plastic tube at T1               |          | 0.491           |
| Poke with electric prod at T1             |          | 0.457           |
| Hit with rubber stick at T1               |          | 0.441           |
| Shouts at T1                              |          | 0.455           |
| Sawing on the transport deck              |          |                 |
| Yes                                       | Ref      |                 |
| No                                        | -0.547   | 0.031           |
| Waiting before unloading                  | 0.030    | 0.040           |
| Total number of human-animal events at T1 | 0.060    | 0.005           |
| Reluctance to move at T2                  |          | 0.980           |
| Pushes at T2                              |          | 0.327           |
| Falling at T2                             |          | 0.159           |
| Huddling at T2                            |          | 0.716           |
| Slipping at T2                            |          | 0.428           |
| Jumping at T2                             |          | 0.425           |
| Turning back at T2                        |          | 0.170           |
| Elimination at T2                         |          | 0.577           |
| Panting at T2                             |          | 0.293           |
| Side discoloration at T2                  | 0.029    | 0.035           |
| Ear discoloration at T2                   | 0.049    | 0.013           |
| Thigh discoloration at T2                 | 0.020    | 0.072           |
| Back discoloration at T2                  | 0.026    | 0.005           |
| Total number of animal events at T2       | 0.135    | 0.0009          |
| Vocalization at T2                        | 0.053    | 0.052           |
| Hit with plastic tube at T2               | 0.129    | 0.001           |

**Table S4.** Associations between the dependent variable of the prevalence of carcasses with shoulder severe lesions and the independent variables of pen conditions and pre-slaughter events at unloading (T1) and before stunning (T2). Estimate values are reported for the variables showing  $p$ -values  $< 0.10$ . Data were obtained from 72 batches, each one made of 23/24 heavy pigs, for a total of 1680 crossbred heavy pigs (Duroc  $\times$  (Landrace  $\times$  Large White)) slaughtered between January and June 2014 in a commercial abattoir in Northern Italy.

| Independent variable                      | Estimate | $p$ -value |
|-------------------------------------------|----------|------------|
| Vehicle:                                  |          |            |
| lorry                                     | ref      |            |
| trailer                                   | 0.772    | 0.038      |
| Deck                                      |          | 0.581      |
| Pen width                                 |          | 0.232      |
| Pen length                                | -0.007   | 0.085      |
| Pen distance from stunning                |          | 0.739      |
| Pen area                                  |          | 0.414      |
| Pen stocking density                      |          | 0.220      |
| Pen space allowance                       |          | 0.442      |
| Falling at T1                             |          | 0.230      |
| Slipping at T1                            |          | 0.323      |
| Turning back at T1                        |          | 0.894      |
| Reluctance to move at T1                  |          | 0.208      |
| Overlapping at T1                         | -0.145   | 0.088      |
| Jumping at T1                             |          | 0.628      |
| Huddling at T1                            |          | 0.623      |
| Vocalization at T1                        |          | 0.316      |
| Panting at T1                             |          | 0.156      |
| Discoloration at T1                       |          | 0.139      |
| Shivering at T1                           |          | 0.515      |
| Lameness at T1                            |          | 0.332      |
| Total number of animal events at T1       |          | 0.720      |
| Hit with stick at T1                      | 0.158    | 0.006      |
| Hit with plastic tube at T1               |          | 0.633      |
| Poke with electric prod at T1             |          | 0.539      |
| Hit with rubber stick at T1               |          | 0.661      |
| Shouts at T1                              |          | 0.603      |
| Sawing on the transport deck              |          | 0.489      |
| Waiting before unloading                  | 0.052    | 0.014      |
| Total number of human-animal events at T1 |          | 0.142      |
| Reluctance to move at T2                  |          | 0.520      |
| Pushes at T2                              |          | 0.334      |
| Falling at T2                             |          | 0.365      |
| Huddling at T2                            |          | 0.460      |
| Slipping at T2                            |          | 0.764      |
| Jumping at T2                             |          | 0.916      |
| Turning back at T2                        |          | 0.189      |
| Elimination at T2                         |          | 0.162      |
| Panting at T2                             |          | 0.370      |
| Side discoloration at T2                  |          | 0.230      |
| Ear discoloration at T2                   | 0.065    | 0.013      |
| Thigh discoloration at T2                 |          | 0.780      |

|                                     |       |       |
|-------------------------------------|-------|-------|
| Back discoloration at T2            |       | 0.100 |
| Total number of animal events at T2 | 0.123 | 0.035 |
| Vocalization at T2                  |       | 0.371 |
| Hit with plastic tube at T2         | 0.125 | 0.025 |
| Shouts at T2                        | 0.128 | 0.019 |

---
